# Supplementary material
Source: MDPI journal article supplement (https://www.mdpi.com/2071-1050/10/9/3306)
Supplement: s1 [file s1]

## Supplementary Material 1

**Table S1.** List of the selected papers with some of the key elements

| Author   | Year | Geographical Location of Studies | Citation Count | Research Themes                                                                     | Keywords                                                                 | Definition                                                                                                                                                                                                                                                                                                                                                                                                          |
|----------|------|----------------------------------|----------------|-------------------------------------------------------------------------------------|--------------------------------------------------------------------------|---------------------------------------------------------------------------------------------------------------------------------------------------------------------------------------------------------------------------------------------------------------------------------------------------------------------------------------------------------------------------------------------------------------------|
| Ervin    | 2016 | United States                    | 2              | integrated technology                                                               | interdisciplinary; public participation; techniques; design process      | "systems-oriented-planning-and-design-for-large-complex-projects-by-interdisciplinary-teams-and-public-participation-using-computers-and-other-digital-devices-and-representations-together-with-GeographicInformation Systems (GIS)- Computer Aided Design(CAD)-BuildingInformation Models (BIM)-and-other-algorithmic-techniques including-timely-simulation-and-impact-assessments"                              |
| Steinitz | 2012 | United States                    | 329            | People of the place, geographic sciences, deign professions, information technology | People, science, design, technology                                      | "geodesign is systems thinking ... geodesign is serious ... geodesign is complex: there are uncertainties ... geodesign support must be flexible, iterative, transparent and rapid ... geodesign is dynamic ... geodesign is communication ... geodesign is a collaborative social-political process of design."                                                                                                    |
| Wilson   | 2015 | United States                    | 26             | GIS and technology                                                                  | critical GIS;design; science; geography; technology                      | "the academic disciplines of design, planning, and geography that are also being reconfigured as technoscience, as geospatial infrastructure and tools change alongside the necessary curricula to train new workforces thereby enabling a fusing of technology and science"                                                                                                                                        |
| Fisher   | 2016 | United States                    | 1              | geodesign education                                                                 | design for future; community engagement                                  | "... the visualization and assessment of alternatives futures using design thinking ... and a method of engaging people - customers, community members, suppliers, and stakeholders - in the co-creation of new products and services, policies and procedures"                                                                                                                                                     |
| Campagna | 2016 | Italy                            | 3              | design process                                                                      | design process; multidisciplinary; community engagement; decision making | "Geodesign entails complex processes involving multidisciplinary teams of stakeholders and communities in devising and choosing sustainable future development scenarios for professionals supporting their territories ... is characterised by the integrated usage of Geographic Information Science methods and tools to transform spatial data into relevant knowledge for informed design and decision-making" |
| Campagna | 2014 | Italy                            | 20             | community engagement and social technology                                          | design process; geographic science; community engagement                 | "... an approach to planning and design as an integrated process which includes project conceptualizations, knowledge building, design of alternative scenarios, evaluation of impacts, decision-making, collaboration and participation, wherein all activities are grounded on robust scientific geographic knowledge support"                                                                                    |

|                |      |               |    |                                                          |                                                                                                                     |                                                                                                                                                                                                                                                                                                                                                                                                                                                                                                                                                                                                                                      |
|----------------|------|---------------|----|----------------------------------------------------------|---------------------------------------------------------------------------------------------------------------------|--------------------------------------------------------------------------------------------------------------------------------------------------------------------------------------------------------------------------------------------------------------------------------------------------------------------------------------------------------------------------------------------------------------------------------------------------------------------------------------------------------------------------------------------------------------------------------------------------------------------------------------|
| Hayek et al.   | 2016 | Switzerland   | 3  | procedural design approach                               | systems thinking; collaborative design process; geographic context                                                  | "... introduce the required information into the design process ... Geodesign seeks to implement (digital) tools and approaches, using geographic knowledge in order to collaboratively design and improve future environments informed by systems thinking ... the larger geographic context is considered, focusing on the interconnected dynamics of the landscape systems"                                                                                                                                                                                                                                                       |
| Cerreta et al. | 2016 | Italy         | 4  | iterative geodesign process                              | iterative design process; multiple scales and disciplines; modeling and simulation                                  | "Geo-Design incorporates elements of sketching and design, but also elements of modelling and analysis ... to facilitate life in geographic space, enhancing collaboration, scenario generation, monitoring of implications, ongoing feedback, and evaluation and selection of optimal designs that reflect a community's needs and visions for the future ... covers a variety of scales, bridging the gap between regional and local contexts ... an iterative design method that uses stakeholders' input, geospatial modelling, impacts simulations, and real-time feedback, to facilitate holistic designs and smart decisions" |
| Li & Milburn   | 2016 | United States | 2  | geodesign history, theories, methods and practical tools | collaborative design process; systems thinking toward complexity and dynamics; technology for public engagement     | "geodesign as providing following tools for designers: (1) science-based design; (2) value-based design; (3) interdisciplinary collaboration; (4) system design to manage complexity; (5) improving the quality and efficiency of design; (6) maximizing social benefits while minimizing social costs; (7) addressing issues over both space and time; (8) advanced tools including online interfaces, handheld GIS tools and idea-driven geographic technologies"                                                                                                                                                                  |
| Moura          | 2015 | Brazil        | 10 | geodesign framework and parametric modeling              | framework; modeling and simulation; design process; interaction                                                     | "... a six-step framework that can be viewed as models of characterization, analysis, landscape simulation and evaluation. It supports decision interactions that allow different actors to understand and participate in the urban question"                                                                                                                                                                                                                                                                                                                                                                                        |
| Muller & Flohr | 2016 | United States | 1  | geodesign education                                      | technology; multidisciplinary; modeling and simulation                                                              | "Geodesign is rooted in use of digital technologies that integrate information about social and natural systems as a basis for modeling, analysis and communication of design and plan effects. Finally Geodesign training tends to cross disciplinary boundaries and thus is distinguished from traditional design education focusing on single career paths"                                                                                                                                                                                                                                                                       |
| Aina           | 2013 | Saudi Arabia  | 3  | geodesign and sustainable urban design                   | synergy; sketching; modeling and simulation; iterative design process; systems thinking with feedback consideration | "... the adaptation of geography, geographic information system and other information systems in a synergetic way to support urban design ... including the following essential elements: 1) Sketching – drawing proposed designs or plans; 2) Spatially aware simulations – modelling different systems (environmental, economic and so on) and how they will respond to proposed design in terms of impacts and change (with geographic reference); 3) Fast feedback – supporting                                                                                                                                                  |

|             |      |                         |    |                                                                   |                                                                                                 |                                                                                                                                                                                                                                                                                                                                                                                                                                                                                                                      |
|-------------|------|-------------------------|----|-------------------------------------------------------------------|-------------------------------------------------------------------------------------------------|----------------------------------------------------------------------------------------------------------------------------------------------------------------------------------------------------------------------------------------------------------------------------------------------------------------------------------------------------------------------------------------------------------------------------------------------------------------------------------------------------------------------|
|             |      |                         |    |                                                                   |                                                                                                 | collaboration; 4) Iteration – trying and visualizing different alternatives; 5) 3D visualization – presenting design alternatives and impacts in three dimension"                                                                                                                                                                                                                                                                                                                                                    |
| Flaxman     | 2009 | United States           | 60 | geodesign fundamentals                                            | modeling and simulation; geographic science; design process                                     | "Geodesign is a design and planning method which tightly couples the creation of a design proposal with impact simulations informed by geographic context"                                                                                                                                                                                                                                                                                                                                                           |
| Slotterback | 2016 | United States           | 7  | geodesign and practical case study on multifunctional landscape   | geographic science; design process; social engagement                                           | "geodesign can be characterized by three facets ... 1) geography by design; ... 2) sketch and simulation accomplished through the technology of design; ... 3) incorporates scientific knowledge, integrates with human decision-making, and allows decision makers to enact the pattern-process-design relationship"                                                                                                                                                                                                |
| Trubka      | 2016 | Australia               | 14 | technical development and practical case study                    | geographic science; design process; PSS                                                         | "embraces the intersection of geography and design ... the development of a new suite of planning support tools to aid the design and planning of cities, particularly at the scale of precincts"                                                                                                                                                                                                                                                                                                                    |
| Miller      | 2013 | United States & Belgium | 37 | geodesign and a measurement framework for transportation planning | framework; integration of methods and technologies; design process                              | "... geodesign provides a framework for organizing methods and technologies for constructing livability indicators, as well as integrating livability measurement into the transportation planning process"                                                                                                                                                                                                                                                                                                          |
| Campagna    | 2016 | Italy                   | 2  | geodesign and regulations                                         | integration of methods and technologies; design process; collaboration; community participation | "Geodesign entails the application of methods and techniques for planning sustainable development in an integrated process, from project conceptualization to analysis, simulation and evaluation, from scenario design to impact assessment, in a process including stakeholder participation and collaboration in decision-making strongly relying on the use of digital information technologies"                                                                                                                 |
| Ervin       | 2011 | United States           | 43 | system for technological development                              | technology; multidisciplinary; modeling and simulation; systems thinking                        | "... usually multidisciplinary, across a range of domain areas, and that they feature a relatively tight coupling between ideation (design) and evaluation or 'generate' and 'test' ... leverage the powers of digital computing and communications technologies to foster information-based design and provide timely feedback about implications of proposed designs, often including impacts and evaluations covering a larger area, greater complexity, or longer time-frame than the immediate design proposal" |

## Supplementary Material 2

### Steinitz's geodesign framework and its corresponding concepts of systems thinking

In table S2, we summarize our geodesign framework by linking with systems-thinking concepts and the Steinitz [10]. The “representation models” are used to identify the significant systems/elements in the studied landscape. It helps identify features and relevant issues. It also helps

define the inherent hierarchies present within the existing landscape that help determine scale and interconnections to frame the contexts. In the “process models”, we should understand the dynamic interconnections among the hierarchical levels. Incorporation within the different levels is critical for geodesign teams to digest the complex processes and mechanisms of the important elements involved in the study area. Moreover, leveraging such incorporations in design does not bring local benefits right away; it generates additional services long after the design is completed and extends the services to surrounding areas. The “evaluation models” should identify evaluation measures by considering how to achieve adaptability of the study area and of the people who participate in the geodesign collaboration. “Adaptive capacity” also suggests continual learning over time through systems’ changes and experience, which demonstrates the necessity for participants to constantly take the evaluation measures into consideration during all geodesign processes. In the “change models”, we should explore possible scenarios by modeling and simulation to evaluate current and future conditions [11]. The classification of scenarios should be defined by the objectives of the project through effective communications of people from different perspectives. The “impact models” investigate the feedback loops underlying the changes from the change models, and respond positively to the feedbacks through appropriate design strategies. When geodesign teams respond positively to the feedback loops through sustainable strategies, the larger landscape system can advance sustainability across multiple scales. When we fail to understand feedback, the landscape system may become vulnerable to disaster [12]. In this model, we should also explore what new structures, patterns and properties of landscape might emerge from the system’s self-organization during the changes. The “decision models” aggregate systems thinking concepts and previous models.

**Table S2.** The geodesign framework [1] and corresponding core concepts of systems thinking.

| Models of geodesign framework                                           | Core concepts of systems thinking                                                                                                                                                                                                                                                                                                                                            |
|-------------------------------------------------------------------------|------------------------------------------------------------------------------------------------------------------------------------------------------------------------------------------------------------------------------------------------------------------------------------------------------------------------------------------------------------------------------|
| <b>Representation models</b><br>How should the study area be described? | <b>Hierarchy</b><br>What decomposable systems are central to our studied landscape and where are they located in a nest structure?                                                                                                                                                                                                                                           |
| <b>Process models</b><br>How does the study area operate?               | <b>Interconnections</b><br>How are the central systems interconnected through what direct effects or feedback loops?<br><b>Self-organization</b><br>What patterns does the existing landscape includes because of self-organization?<br><b>Cross-scale dynamics</b><br>How to describe the spatial, temporal, quantitative and analytical dimensions of the central systems? |
| <b>Evaluation models</b><br>Is the current study area working well?     | <b>Adaptive capability</b><br>What measures might be used to evaluate the adaptability of the study area and people?                                                                                                                                                                                                                                                         |
| <b>Change models</b><br>How might the study area be altered?            | <b>Scenarios and testing models</b><br>What possible scenarios might be made by considering the measures created in the evaluation models?                                                                                                                                                                                                                                   |
| <b>Impact models</b><br>What differences might the changes cause?       | <b>Feedback loops</b><br>What direct effects and feedback loops might the changes cause?<br><b>Emergence</b><br>What new structures, patterns, and properties of landscape might arise from systems themselves because of the changes?                                                                                                                                       |
| <b>Decision models</b><br>How should the study area be changed?         | All concepts                                                                                                                                                                                                                                                                                                                                                                 |

## Supplementary Material 3

### Methodology

To identify existing perspectives, definitions and theories of geodesign, we conducted a thorough review of all found literature related. We used the systematic literature review methodology developed by Tranfield, et al. [13] and Williams, et al. [14] to select articles for review. This methodology resulted in an initial collection of 1,023 articles and a final set of 75 papers. We didn't use the same methodology to search, screen and analyze the articles about ecological systems thinking because of its gigantic amounts. However, it has also been reviewed and served as an

important methodological approach for the whole process. With a diagram (Fig. S3) showing the processes and corresponded results, we explain the method we used to select articles below.

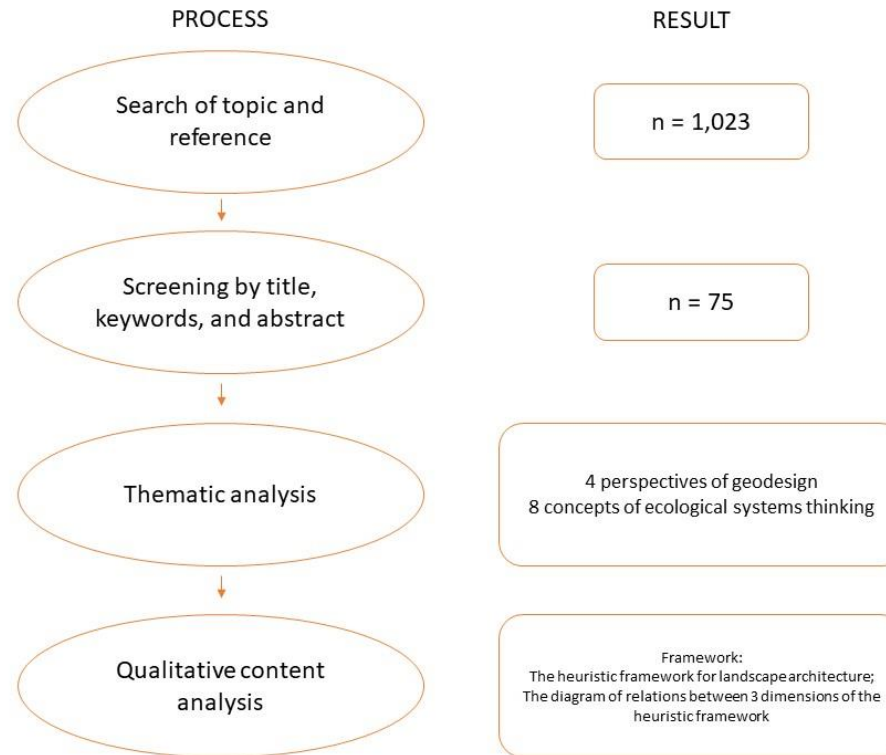

Figure S3. Processes and corresponded results of the research method

### 2.1. Search

Phase 1: First, we set the major criteria for this review: i) review topic: geodesign, systems thinking; ii) review context: multiple disciplines; iii) dimension of time: published online between 1990 and 2017; iv) dimension of space: all over the world; v) language: English.

Phase 2: Then we conducted an extensive search using multiple databases: Google Scholar, Scopus and the Web of Science. We used two keyword strings to identify related articles. The first keyword string ensured the articles are related to geodesign. The second string was developed to capture articles related to landscape architecture, which was selected in filters. Our database search showed that there were no previous reviews published on systems thinking and geodesign.

Phase 3: Using the same selection criteria in Phase 1, we also conducted a reference list search and cited reference search from the full-text articles found from the databases above. For newly-identified articles, we repeated the reference search until no additional articles were found. This process identified 1,023 potentially relative articles for the review.

## 2.2. Screening

Phase 4: We began the screening process by reviewing the titles, keywords and abstracts. In this procedure, we coded each article either 'related,' 'unrelated' or 'not-sure.' The 'related' articles were determined to be thematically relevant to my objectives. The 'unrelated' articles were those not applicable to geodesign-related or environmental-related studies. For the 'not-sure' category, we reviewed full articles based on the same screening criteria. This stage reduced the number of papers to be used in the review to 75.

## 2.3. Thematic analysis

Phase 5: A thematic analysis was conducted using deductive codes including empirical or conceptual, level of analysis, contribution to literature, methods used, etc. [14]. The theoretical deductive codes were acquired from the literature: human-environment systems [15], geographic sciences [10], iterative design process [16], community collaboration [5], and systems-thinking scopes including hierarchical systems, interconnections, functions, feedback loops, delays, dynamics, etc. [17]. The thematic analysis ultimately resulted in 4 theoretical perspectives of geodesign (Fig. 2) and core concepts of ecological systems thinking (section 3.2).

## 2.4. Qualitative content analysis

Based on the method of qualitative content analysis developed by Luederitz, et al. [18], we explored similarities and differences of the literature to create the conceptual framework. In this phase, we identified the major geodesign concepts used in each article. In the qualitative content analysis, we first paraphrased each concept to extract the core contents into keywords. Second, we integrated these geodesign concepts with ecological systems theory. To do so, we compared their keywords. If similar, they were integrated. If different, they became new complementary concepts. If a geodesign concept corresponded to more than one concept of ecological systems theory, we compartmentalized it. Third, we summarized and categorized the examined concepts into several groups to set up the main structure of the framework (Fig. 4). Fourth, we identify the interrelationships of each group of concepts to accomplish the holistic framework (Fig. 4 & Fig. 5).

## References

1. Steinitz, C. A framework for geodesign. *Esri Press* **2012**, Chapter 1, 3-18.
2. Muller, B.; Flohr, T. A geodesign approach to environmental design education: Framing the pedagogy, evaluating the results. *Landscape and Urban Planning* **2016**, 156, 101-117.
3. Aina, Y.; Al-Naser, A.; Garba, S. Towards an integrative theory approach to sustainable urban design in saudi arabia: The value of geodesign. In *Advances in landscape architecture*, InTech: Vienna, Austria: 2013.
4. Flaxman, M. Fundamental issues in geodesign. *Digital Landscape Architecture* **2009**.

5. Slotterback, C.S.; Runck, B.; Pitt, D.G.; Kne, L.; Jordan, N.R.; Mulla, D.J.; Zerger, C.; Reichenbach, M. Collaborative geodesign to advance multifunctional landscapes. *Landscape and Urban Planning* **2016**, *156*, 71-80.
6. Trubka, R.; Glackin, S.; Lade, O.; Pettit, C. A web-based 3d visualisation and assessment system for urban precinct scenario modelling. *ISPRS Journal of Photogrammetry and Remote Sensing* **2016**, *117*, 175-186.
7. Miller, H.J.; Witlox, F.; Tribby, C.P. Developing context-sensitive livability indicators for transportation planning: A measurement framework. *Journal of Transport Geography* **2013**, *26*, 51-64.
8. Campagna, M. Metaplanning: About designing the geodesign process. *Landscape and Urban Planning* **2016**, *156*, 118-128.
9. Ervin, S. A system for geodesign. *Proceedings of Digital Landscape Architecture, Anhalt University of Applied Science* **2011**, 145-154.
10. Steinitz, C. A framework for geodesign. *Esri Press: Redlands, CA, USA* **2012**, Chapter 1, 3-18.
11. Gu, Y.; Deal, B. Coupling systems thinking and geodesign processes in land-use modelling, design, and planning. *Journal of Digital Landscape Architecture* **2018**, *3*, 2.
12. Whiteman, G.; Forbes, B.C.; Niemelä, J.; Chapin III, F.S. Bringing feedback and resilience of high-latitude ecosystems into the corporate boardroom. *AMBIO: A Journal of the Human Environment* **2004**, *33*, 371-376.
13. Tranfield, D.; Denyer, D.; Smart, P. Towards a methodology for developing evidence-informed management knowledge by means of systematic review. *British journal of management* **2003**, *14*, 207-222.
14. Williams, A.; Kennedy, S.; Philipp, F.; Whiteman, G. Systems thinking: A review of sustainability management research. *Journal of Cleaner Production* **2017**, *148*, 866-881.
15. Wu, J. Urban ecology and sustainability: The state-of-the-science and future directions. *Landscape and Urban Planning* **2014**, *125*, 209-221.
16. Foster, K. Geodesign parsed: Placing it within the rubric of recognized design theories. *Landscape and Urban Planning* **2016**, *156*, 92-100.
17. Meadows, D.H. Thinking in systems. *White River Junction, VT: Chelsea Green Publishing* **2008**, 77-78.
18. Luederitz, C.; Lang, D.J.; Von Wehrden, H. A systematic review of guiding principles for sustainable urban neighborhood development. *Landscape and Urban Planning* **2013**, *118*, 40-52.
19. Wilson, M.W. On the criticality of mapping practices: Geodesign as critical gis? *Landscape and Urban Planning* **2015**, *142*, 226-234.
20. Fisher, T. An education in geodesign. *Landscape and Urban Planning* **2016**, *156*, 20-22.
21. Campagna, M.; Di Cesare, E.A. Geodesign: Lost in regulations (and in practice). In *Smart energy in the smart city; springer: Cham, switzerland*, Springer: 2016; pp 307-327.
22. Campagna, M. In *The geographic turn in social media: Opportunities for spatial planning and geodesign*, International Conference on Computational Science and Its Applications, Cham, Switzerland, 2014; Springer: Cham, Switzerland, pp 598-610.
23. Hayek, U.W.; von Wirth, T.; Neuenschwander, N.; Grêt-Regamey, A. Organizing and facilitating geodesign processes: Integrating tools into collaborative design processes for urban transformation. *Landscape and Urban Planning* **2016**, *156*, 59-70.
24. Cerreta, M.; Inglese, P.; Manzi, M.L. A multi-methodological decision-making process for cultural landscapes evaluation: The green lucania project. *Procedia-Social and Behavioral Sciences* **2016**, *216*, 578-590.
25. Li, W.; Milburn, L.-A. The evolution of geodesign as a design and planning tool. *Landscape and Urban Planning* **2016**, *156*, 5-8.
26. Moura, A.C.M. Geodesign in parametric modeling of urban landscape. *Cartography and Geographic Information Science* **2015**, *42*, 323-332.
27. Ervin, S.M. Technology in geodesign. *Landscape and Urban Planning* **2016**, *156*, 12-16.
